# Supplementary material for: Hypomorphic conditional deletion of E11/Podoplanin reveals a role in osteocyte dendrite elongation
Source: PubMed Central journal article supplement (PMC5575468; doi:10.1002/jcp.25999), 2017-06-14
Supplement: JCP-232-3006-s001.pdf [file JCP-232-3006-s001.pdf]

## **Hypomorphic conditional deletion of E11/Podoplanin reveals a pivotal role in osteocyte dendrite elongation**

Dr. Katherine A. Staines PhD<sup>1,2\*</sup>, Dr. Behzad Javaheri PhD<sup>3</sup>, Dr. Peter Hohenstein PhD<sup>1</sup>, Mr. Robert Fleming BSc<sup>1</sup>, Mr Mark Hopkinson BSc<sup>3</sup>, Dr. David J. Buttle PhD<sup>4</sup>, Prof. Andrew A. Pitsillides PhD<sup>3</sup>, Prof. Colin Farquharson PhD<sup>1</sup>

<sup>1</sup> Roslin Institute and R(D)SVS, The University of Edinburgh, Easter Bush, Midlothian, UK EH25 9RG <sup>2</sup> School of Applied Sciences, Edinburgh Napier University, Sighthill Campus, Edinburgh UK EH11 4BN <sup>3</sup> Comparative Biomedical Sciences, Royal Veterinary College, Royal College Street, London, UK NW1 0TU <sup>4</sup> Dept of Infection, Immunity and Cardiovascular Disease, University of Sheffield

\* Corresponding author

Katherine A. Staines

School of Applied Sciences

Edinburgh Napier University

Sighthill Campus

Edinburgh EH11 4BN

Email: [k.staines@napier.ac.uk](mailto:k.staines@napier.ac.uk)

Tel: 0131 455 3369

**Suppl Fig 1.** Gait analysis of 6-week old male fl/fl and cKO mice (n=4/genotype/sex). Data are represented as mean  $\pm$  S.E.M

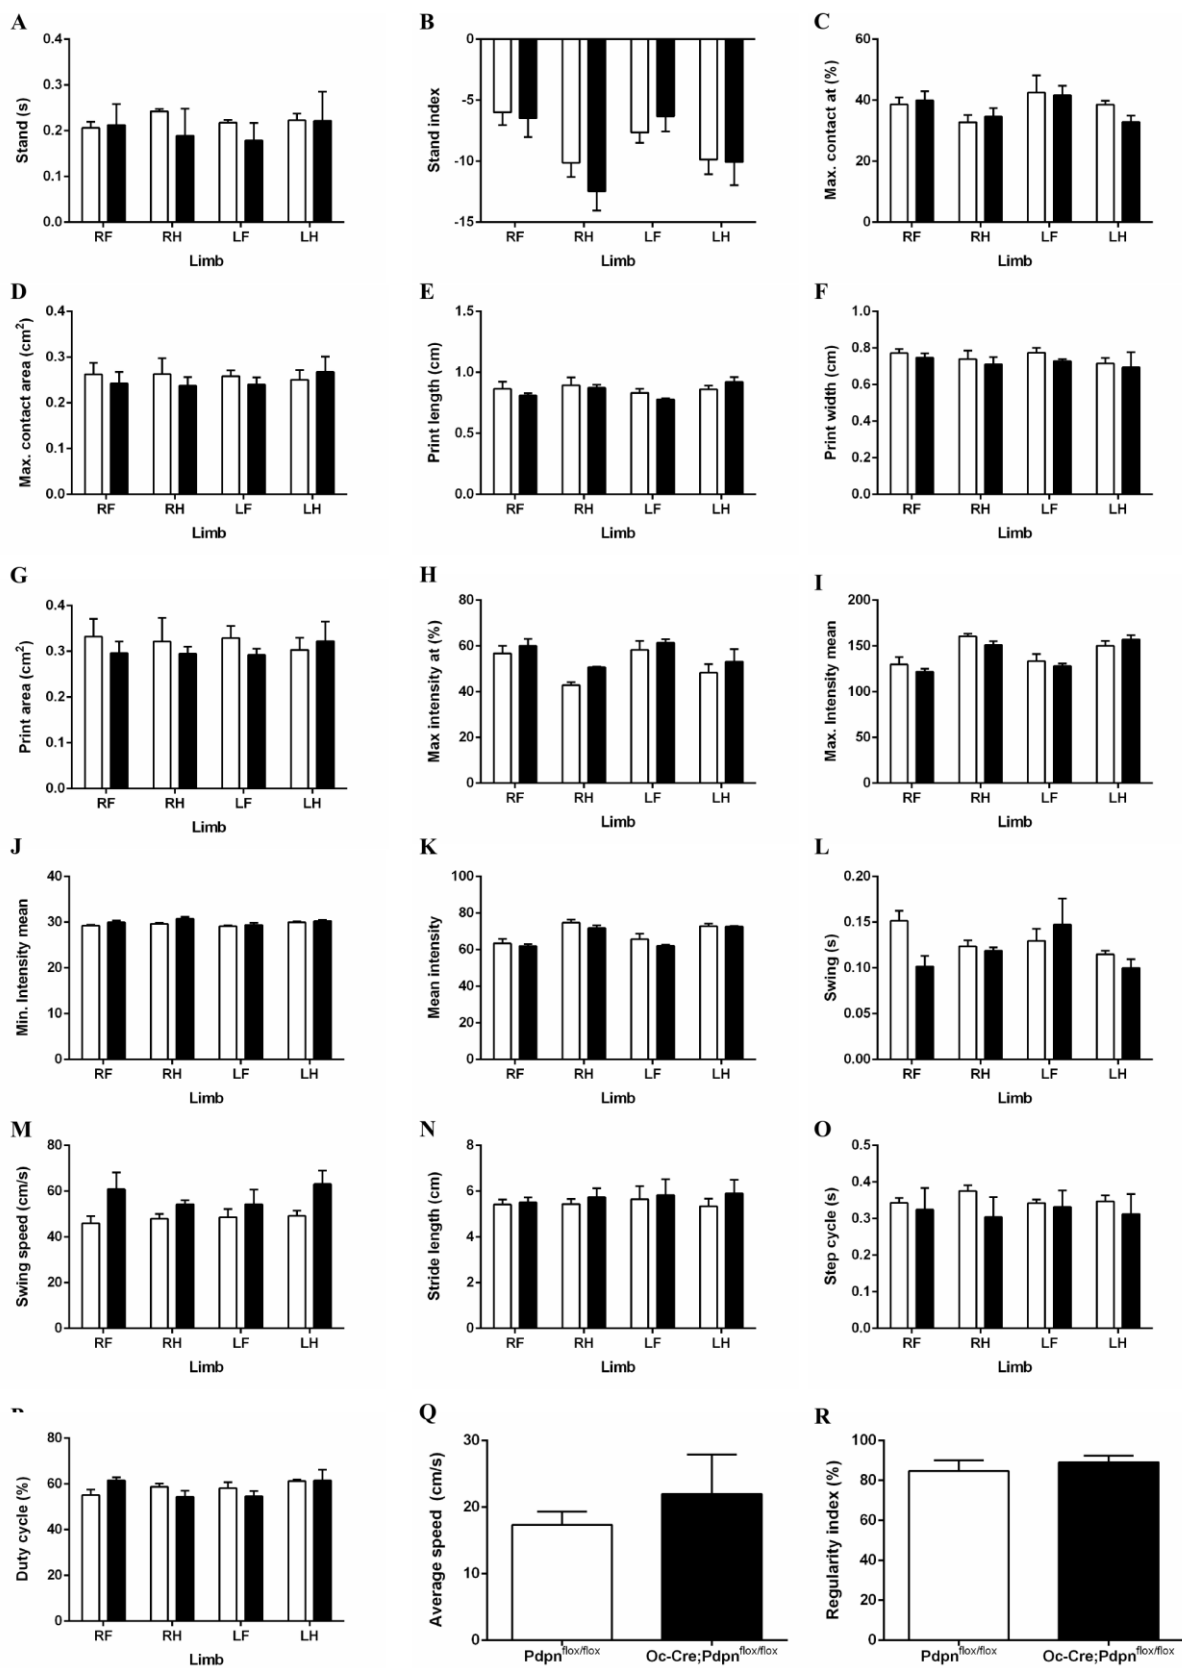

**Suppl. Table 1.** Gait parameters explored in this study

| <b>Paw Parameter</b>                | <b>Explanation</b>                                                                                                                                                                                                         |
|-------------------------------------|----------------------------------------------------------------------------------------------------------------------------------------------------------------------------------------------------------------------------|
| Stand (s)                           | The duration in seconds of contact of a paw with the glass plate                                                                                                                                                           |
| Stand Index                         | The speed at which the paw loses contact with the glass plate                                                                                                                                                              |
| Max Contact At (%)                  | $(\text{Max Contact At (s)} - \text{Initial Contact At (s)}) / \text{Stand (s)} \times 100\%$<br>Max Contact At (s) : the time in seconds since the start of the run that a paw makes maximum contact with the glass plate |
| Max Contact Area (mm <sup>2</sup> ) | The maximum area of a paw (in the Distance Unit) that comes into contact with the glass plate                                                                                                                              |
| Print Length (mm)                   | The length (horizontal direction) of the complete print                                                                                                                                                                    |
| Print Width (mm)                    | The width (vertical direction) of the complete paw print                                                                                                                                                                   |
| Print Area (mm <sup>2</sup> )       | The surface area of the complete print                                                                                                                                                                                     |
| Max Intensity At (%)                | $(\text{Max Intensity At (s)} - \text{Initial Contact At (s)}) / \text{Stand (s)} \times 100\%$<br>Max Intensity At (s): the time in seconds since the start of the run that the maximum intensity is measured             |
| Maximum Intensity mean              | The mean maximum intensity of the complete paw                                                                                                                                                                             |
| Minimum Intensity mean              | The mean minimum intensity of the complete paw                                                                                                                                                                             |
| Mean Intensity                      | The mean intensity of the complete paw                                                                                                                                                                                     |
| Swing (s)                           | The duration in seconds of no contact of a paw with the glass plate                                                                                                                                                        |
| Swing Speed (cm/s)                  | The speed of the paw during Swing: $\text{Stride Length} / \text{Swing}$                                                                                                                                                   |
| Stride Length (cm)                  | The distance between successive placements of the same paw                                                                                                                                                                 |
| Step Cycle (s)                      | The time in seconds between two consecutive Initial Contacts of the same paw: Stand + Swing                                                                                                                                |
| Duty Cycle (%)                      | Stand as a percentage of Step Cycle: $\text{Stand} / (\text{Stand} + \text{Swing}) \times 100\%$                                                                                                                           |
| Average speed (cm/s)                | The average speed of the run                                                                                                                                                                                               |
| Regularity index (%)                | The number of normal step sequence patterns relative to the total number of paw placements                                                                                                                                 |
